# Supplementary material
Source: HighWire-hosted journal article supplement (https://erj.ersjournals.com/content/60/4/2201198)
Supplement: inline-supplementary-material-1 [file inline-supplementary-material-1.pdf]

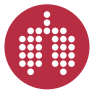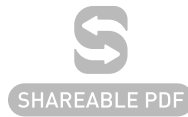

# Measuring intra-subject changes in respiratory mechanics by oscillometry: impedance *versus* admittance

Ramon Farré<sup>1,2,3</sup>

<sup>1</sup>Unitat de Biofísica i Bioenginyeria, Facultat de Medicina i Ciències de la Salut, Universitat de Barcelona, Barcelona, Spain. <sup>2</sup>CIBER de Enfermedades Respiratorias, Madrid, Spain. <sup>3</sup>Institut Investigacions Biomediques August Pi Sunyer, Barcelona, Spain.

Corresponding author: Ramon Farré ([rfarre@ub.edu](mailto:rfarre@ub.edu))

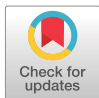

Shareable abstract (@ERSpublications)

**Measuring intra-subject changes in respiratory mechanics by oscillometry may be optimised by using respiratory admittance instead of impedance** <https://bit.ly/3T2WeWb>

**Cite this article as:** Farré R. Measuring intra-subject changes in respiratory mechanics by oscillometry: impedance *versus* admittance. *Eur Respir J* 2022; 60: 2201198 [DOI: 10.1183/13993003.01198-2022].

This single-page version can be shared freely online.

Copyright ©The authors 2022.  
For reproduction rights and  
permissions contact  
[permissions@ersnet.org](mailto:permissions@ersnet.org)

Received: 11 June 2022  
Accepted: 15 Aug 2022

*To the Editor:*

Recent state-of-the-art reviews [1, 2] and research [3] have pointed out the potential interest of oscillometry for noninvasively characterising lung mechanics from the relationship between oscillatory pressure ( $P$ ) and flow ( $V'$ ) at different frequencies. Two magnitudes have usually represented this relationship: resistance ( $R$ ) and reactance ( $X$ ), which are the real and imaginary parts of respiratory impedance ( $Z=R+j\cdot X$ ). Clinical [1, 2] and modelling data [4] show that both  $R$  and  $X$  depend on the interaction between resistances and compliances of central and peripheral airways and lung tissues. Even at the low oscillometry frequency of 5 Hz (which is a critical reference frequency for clinical studies [1, 2]), a simple interpretation of  $R$  and  $X$  is not possible [4]. Interestingly, the same pathophysiological information is contained in  $Z$  and in its reciprocal: admittance ( $Y$ ;  $Y=1/Z$ ). The real and imaginary parts of  $Y$  ( $Y=G+j\cdot B$ ; where  $G$  is conductance and  $B$  susceptance) are univocally equivalent to  $R$  and  $X$ :  $G=R/(R^2+X^2)$ ,  $B=-X/(R^2+X^2)$ , and, therefore, changes in  $R$  and  $X$  are paralleled by changes in  $G$  and  $B$ . Although  $Y$  is currently not so familiar as  $Z$ , it should be mentioned that both are conceptually similar (*i.e.*,  $V'/P$  instead of  $P/V'$ ). In particular,  $G$  has an interpretation as simple as that of  $R$ :  $G$  is the component of flow in phase with pressure. Given that almost all the oscillometry literature is referred to  $Z$ , why focus here on  $Y$ ?
